# Supplementary material for: Catalytic cascade vapor-phase hydrotreatment of plastic waste into fuels and its sustainability assessment
Source: Royal Society of Chemistry journal article supplement (doi:10.1039/d2gc02538h), 2022-01-01
Supplement: d2gc02538h2.xlsx [file d2gc02538h2.xlsx]

## Sheet: A-Element analysis 
Input	Required data			Output	Required data
Feedstock (g)	PE (60%)	PP (40%)		Gas	g/kg feedstock
Proximate analysis (dry basis) (wt%)				C3H8	114.976
Moisture	0.011	1.1		C4H10	64.6739
Ash	0	0.088		Liquid component	g/kg feedstock
Fixed carbon	0.049	0.002		Intermediate product from hydropyrolysis reactor
Volatile matter	99.94	98.81		iso-alkanes
Ultimate analysis (dry basis) (wt%)				C6H12	47.3987
Ash				C8H16	26.1951
Carbon	85.44	85.45		C9H18	165.744
Hydrogen	14.37	14.33		C10H20	13.6614
Nitrogen	0.19	0.22		C15H30	51.3182
Chlorine (if exist)	0	0		n-alkanes
Sulfur (if exist)	0	0		C5H10	38.0473
Oxygen	0	0		C6H12	34.5325
Sulfur analysis (dry basis) (wt%)				C7H14	20.7413
Pyritic				C8H16	18.856
Sulfate				C9H18	20.1526
Organic				C10H20	27.8631
Catalysts	NiAl2O4			C11H22	28.8317
				C12H23	53.0354
				C13H26	36.0515
				C14H28	31.2786
				C15H30	30.2404
				C16H32	25.3074
				C17H34	20.5665
				C18H36	16.2265
				C19H38	12.5536
				C20H40	5.66585
				C21H42	4.02257
				CXHY	92.0606
				Final products from hydrogenation reactor	g/Kg feedstock
				iso-alkanes
				C6H14	51.9574
				C8H18	30.2283
				C9H20	183.094
				C10H22	14.8889
				C15H32	57.0421
				n-alkanes
				C5H12	44.6388
				C6H14	42.8499
				C7H16	30.1217
				C8H18	25.4719
				C9H20	25.015
				C10H22	39.8113
				C11H24	38.1411
				C12H26	59.7418
				C13H28	44.9376
				C14H30	41.3904
				C15H32	37.8216
				C16H34	29.9652
				C17H36	23.2332

## Sheet: B-Energy efficiency
CCS
Input	C	H	mass	HHV	Energy	Energy
	%	%	kg/h	MJ/kg	MJ/h	kW
PE	85.44	14.37	600	46.7558	28053.5	7792.63
PP	85.45	14.33	400	46.7128	18685.1	5190.31
	Mass in	Recycle	mass consumed	HHV	Energy	Energy
	kg/h	kg/h	kg/h	MJ/kg	MJ/h	kW
H2	141.667	114	27.667	141.86	3924.84	1090.23
Electricity required						319.689
Output	C mass	H mass	mass	C	H	HHV	Energy	Energy
	kg/h	kg/h	kg/h	%	%	MJ/kg	MJ/h	kW
Jet fuel	312.238	56.4345	368.673	84.6925	15.3075	47.5828	17542.5	4872.91
Gasoline	354.98	67.4376	422	84.1185	15.9805	48.1634	20324.9	5645.82
Electricity generated								597.63
Energy efficiency	0.772352
Energy
Input	C	H	mass	HHV	Energy	Energy
	%	%	kg/h	MJ/kg	MJ/h	kW
PE	85.44	14.37	600	46.7558	28053.5	7792.63
PP	85.45	14.33	400	46.7128	18685.1	5190.31
	Mass in	Recycle	mass consumed	HHV	Energy	Energy
	kg/h	kg/h	kg/h	MJ/kg	MJ/h	kW
H2	141.667	114	27.667	141.86	3924.84	1090.23
Electricity required						286.943
Heat required						601.066
Output	C mass	H mass	mass	C	H	HHV	Energy	Energy
	kg/h	kg/h	kg/h	%	%	MJ/kg	MJ/h	kW
Jet fuel	312.238	56.4345	368.673	84.6925	15.3075	47.5828	17542.5	4872.91
Gasoline	354.98	67.4376	422	84.1185	15.9805	48.1634	20324.9	5645.82
Fuel gas	184	52	236	77.9661	22.0339	53.0373	12516.8	3476.89
Energy efficiency	0.935462

## Sheet: C-LCI_No combustion
Input	mass	Normalized
	kg/h	kg/MJ product
Plastic blend	1000	0.0264079
PP	400
PE	600
H2 make-up	28	0.000739422
Cooling water	106699	2.8177
	kW	MJ/MJ product
Heat required	0	0
Heat required for plant	601.066	0.0571425
	kW	kWh/MJ product
Electricity required for plant	286.943	0.00757757
Output
Product	kg/h	kg/MJ product
Jet fuel	368.673	0.00975285
Gasoline	422	0.0117448
Total heat value	MJ	MJ/MJ product
	37867.4	1
		m3/MJ product
Fuel gas	236	0.00814959
	kW	kWh/MJ product
Emissions	kg/h	kg/MJ product
C3H8	0.33268	8.78539e-06
C4H10	0.176	4.64779e-06
C5H12	0.07865	2.07698e-06

## Sheet: D-LCI_Combustion+CCS
Input	mass	Normalized
Feedstock	kg/h	kg/MJ product
Plastic blend	1000	0.0264079
PP	400
PE	600
Chemicals	kg/h	kg/MJ product
H2 make-up	28	0.000739422
MEA 30%wt	0.0104118	2.74954e-07
		m3/MJ product
Cooling water	154211	0.00541018
BFW make-up	36	0.000950685
	kW	MJ/MJ product
Heat required for BFW	3.221	0.000306216
Energy consumption		MJ/MJ product
Heat for CCS		0.0410912
		kWh/MJ product
Electricity for CCS		0.00223522
Output
Product	kg/h	kg/MJ product
Jet fuel	368.673	0.00975285
Gasoline	422	0.0117448
	MJ	MJ/MJ product
Total heat value	37867.4	1
	kW	kWh/MJ product
Electricity generated	277.941	0.00733984
Emissions	kg/h	kg/MJ product
NO2	0.0460055	1.21491e-06
CO	0.00280104	7.39696e-08
CO2 for MEA treatment		1.32218e-06
NO2 for MEA treatment		6.91141e-07
CO2 after CCS		0.00178658
MEA		2.54771e-12
NH3		5.2228e-11

## Sheet: E-LCI_CCS
Input	Amount	Normalized
Chemicals	kg/kg CO2 captured	kg/kg CO2 input
Monoethanolamine (MEA) 30%wt.	5.7e-05	5.13e-05
Energy consumption		MJ/kg CO2 input
Regeneration heat		2.3
	kWh/kg CO2 captured	kWh/kg CO2 input
Energy requirement for CO2 compression		0.12
Energy requirement for CO2 injection	0.00568	0.005112
Output	Amount	Normalized
Emissions to air	kg/kg CO2 captured	kg/kg CO2 input
MEA	6e-06	5.4e-06
NH3	0.000123	0.0001107
	m3/kg CO2 captured	m3/kg CO2 input
Cooling water	0.0832	0.07488
MEA treatment	kg/kg CO2 captured	kg/kg CO2 input
CO2		7.40066e-05
NO2		3.86852e-05

## Sheet: F-LCIA_CML
	GWP
	g CO2e/MJ
Energy_H2-grid	13.0061
Energy_H2-wind	6.63629
CCS_H2-grid	10.592
CCS_H2-wind	4.22224
Fuel avoided	15.0851
Energy_H2-grid
Impact category	Unit	Total	Heat, district or industrial, natural gas {Europe without Switzerland}| heat production, natural gas, at industrial furnace >100kW | Cut-off, U	Electricity, high voltage {CN-HU}| electricity, high voltage, production mix | Cut-off, U	Natural gas, low pressure {RoW}| natural gas pressure reduction from high to low pressure | Cut-off, U	Process emissions without boiler	H2 elec grid
Abiotic depletion	kg Sb eq	3.66205e-08	8.14609e-11	2.18527e-09	-2.00501e-10	0	3.45542e-08
Abiotic depletion (fossil fuels)	MJ	-0.143011	0.0637547	0.0318497	-0.316389	0	0.0777743
Global warming (GWP100a)	kg CO2 eq	0.0130061	0.00391864	0.00354671	-0.00281239	0	0.00835312
Ozone layer depletion (ODP)	kg CFC-11 eq	6.49551e-09	4.96776e-10	1.41186e-11	-1.88245e-09	0	7.86707e-09
Human toxicity	kg 1,4-DB eq	0.000867404	5.70763e-05	0.000614717	-0.00121853	0	0.00141414
Fresh water aquatic ecotox.	kg 1,4-DB eq	-0.00021415	1.30217e-06	1.25933e-05	-0.000264156	0	3.61105e-05
Marine aquatic ecotoxicity	kg 1,4-DB eq	10.9671	0.0297174	3.91169	-1.13116	0	8.1569
Terrestrial ecotoxicity	kg 1,4-DB eq	1.02706e-05	2.02421e-07	3.12728e-06	-8.84174e-07	0	7.82508e-06
Photochemical oxidation	kg C2H4 eq	4.8459e-06	2.08669e-07	5.33871e-07	-1.26341e-06	4.00267e-06	1.3641e-06
Acidification	kg SO2 eq	3.88211e-05	2.36904e-06	1.45716e-05	-1.45149e-05	0	3.63953e-05
Eutrophication	kg PO4--- eq	5.54866e-06	2.9879e-07	1.58908e-06	-7.57993e-07	0	4.41878e-06
Energy_H2-wind
Impact category	Unit	Total	Heat, district or industrial, natural gas {Europe without Switzerland}| heat production, natural gas, at industrial furnace >100kW | Cut-off, U	Electricity, high voltage {CN-HU}| electricity, high voltage, production mix | Cut-off, U	Natural gas, low pressure {RoW}| natural gas pressure reduction from high to low pressure | Cut-off, U	Process emissions without boiler	H2 wind elec
Abiotic depletion	kg Sb eq	3.28948e-08	8.14609e-11	2.18527e-09	-2.00501e-10	0	3.08285e-08
Abiotic depletion (fossil fuels)	MJ	-0.20019	0.0637547	0.0318497	-0.316389	0	0.0205949
Global warming (GWP100a)	kg CO2 eq	0.00663629	0.00391864	0.00354671	-0.00281239	0	0.00198333
Ozone layer depletion (ODP)	kg CFC-11 eq	6.47012e-09	4.96776e-10	1.41186e-11	-1.88245e-09	0	7.84168e-09
Human toxicity	kg 1,4-DB eq	-0.000224218	5.70763e-05	0.000614717	-0.00121853	0	0.000322523
Fresh water aquatic ecotox.	kg 1,4-DB eq	-0.000236728	1.30217e-06	1.25933e-05	-0.000264156	0	1.3533e-05
Marine aquatic ecotoxicity	kg 1,4-DB eq	3.93432	0.0297174	3.91169	-1.13116	0	1.12408
Terrestrial ecotoxicity	kg 1,4-DB eq	5.12522e-06	2.02421e-07	3.12728e-06	-8.84174e-07	0	2.6797e-06
Photochemical oxidation	kg C2H4 eq	3.8863e-06	2.08669e-07	5.33871e-07	-1.26341e-06	4.00267e-06	4.04502e-07
Acidification	kg SO2 eq	1.26382e-05	2.36904e-06	1.45716e-05	-1.45149e-05	0	1.02125e-05
Eutrophication	kg PO4--- eq	2.69352e-06	2.9879e-07	1.58908e-06	-7.57993e-07	0	1.56364e-06
CCS_H2-grid
Impact category	Unit	Total	Hydrogen, hubei, plastic pyrolysis	Water, completely softened {RER}| water production, completely softened | Cut-off, U	Heat, district or industrial, natural gas {Europe without Switzerland}| heat production, natural gas, at industrial furnace >100kW | Cut-off, U	Heat, district or industrial, natural gas {Europe without Switzerland}| heat production, natural gas, at industrial furnace >100kW | Cut-off, U	Electricity, high voltage {CN-HU}| electricity, high voltage, production mix | Cut-off, U	Process emissions with CCS	Monoethanolamine {RER}| ethanolamine production | Cut-off, U
Abiotic depletion	kg Sb eq	3.31419e-08	3.45542e-08	5.43184e-13	4.3653e-13	5.85794e-11	-1.47213e-09	0	2.05407e-13
Abiotic depletion (fossil fuels)	MJ	0.102525	0.0777743	3.31392e-06	0.000341646	0.0458467	-0.0214559	0	1.52767e-05
Global warming (GWP100a)	kg CO2 eq	0.010592	0.00835312	3.02248e-07	2.09991e-05	0.00281794	-0.00238928	0.00178832	6.28161e-07
Ozone layer depletion (ODP)	kg CFC-11 eq	8.21757e-09	7.86707e-09	6.39057e-14	2.66211e-12	3.57237e-10	-9.51111e-12	0	4.70655e-14
Human toxicity	kg 1,4-DB eq	0.00106112	0.00141414	3.11749e-08	3.05859e-07	4.10442e-05	-0.000414111	2.28733e-06	1.74199e-05
Fresh water aquatic ecotox.	kg 1,4-DB eq	2.85833e-05	3.61105e-05	1.34705e-09	6.978e-09	9.36401e-07	-8.48359e-06	0	1.16282e-08
Marine aquatic ecotoxicity	kg 1,4-DB eq	5.54355	8.1569	0.000180272	0.000159248	0.0213701	-2.63515	0	9.68949e-05
Terrestrial ecotoxicity	kg 1,4-DB eq	5.86568e-06	7.82508e-06	3.87665e-10	1.08473e-09	1.45563e-07	-2.10672e-06	0	2.79878e-10
Photochemical oxidation	kg C2H4 eq	1.21119e-06	1.3641e-06	5.33095e-11	1.11821e-09	1.50056e-07	-3.59648e-07	5.5368e-08	1.35734e-10
Acidification	kg SO2 eq	2.92518e-05	3.63953e-05	1.3667e-09	1.26951e-08	1.7036e-06	-9.81631e-06	9.53134e-07	2.00987e-09
Eutrophication	kg PO4--- eq	3.81411e-06	4.41878e-06	1.78772e-10	1.60115e-09	2.14864e-07	-1.0705e-06	2.47811e-07	1.3707e-09
CCS_H2-wind
Impact category	Unit	Total	Hydrogen, wind electricity, hubei, plastic pyrolysis	Water, completely softened {RER}| water production, completely softened | Cut-off, U	Heat, district or industrial, natural gas {Europe without Switzerland}| heat production, natural gas, at industrial furnace >100kW | Cut-off, U	Heat, district or industrial, natural gas {Europe without Switzerland}| heat production, natural gas, at industrial furnace >100kW | Cut-off, U	Electricity, high voltage {CN-HU}| electricity, high voltage, production mix | Cut-off, U	Process emissions with CCS	Monoethanolamine {RER}| ethanolamine production | Cut-off, U	H2 wind elec
Abiotic depletion	kg Sb eq	2.94162e-08	3.06245e-08	4.3653e-13	5.43184e-13	5.85794e-11	-1.47213e-09	0	2.05407e-13	2.0408e-10
Abiotic depletion (fossil fuels)	MJ	0.0453459	0.0204988	0.000341646	3.31392e-06	0.0458467	-0.0214559	0	1.52767e-05	9.61248e-05
Global warming (GWP100a)	kg CO2 eq	0.00422224	0.00197505	2.09991e-05	3.02248e-07	0.00281794	-0.00238928	0.00178832	6.28161e-07	8.28152e-06
Ozone layer depletion (ODP)	kg CFC-11 eq	8.19218e-09	7.84168e-09	2.66211e-12	6.39057e-14	3.57237e-10	-9.51111e-12	0	4.70655e-14	7.91181e-18
Human toxicity	kg 1,4-DB eq	-3.04991e-05	0.000308696	3.05859e-07	3.11749e-08	4.10442e-05	-0.000414111	2.28733e-06	1.74199e-05	1.38272e-05
Fresh water aquatic ecotox.	kg 1,4-DB eq	6.00574e-06	1.3464e-05	6.978e-09	1.34705e-09	9.36401e-07	-8.48359e-06	0	1.16282e-08	6.89881e-08
Marine aquatic ecotoxicity	kg 1,4-DB eq	-1.48927	1.12249	0.000159248	0.000180272	0.0213701	-2.63515	0	9.68949e-05	0.00158976
Terrestrial ecotoxicity	kg 1,4-DB eq	7.20293e-07	2.20129e-06	1.08473e-09	3.87665e-10	1.45563e-07	-2.10672e-06	0	2.79878e-10	4.78406e-07
Photochemical oxidation	kg C2H4 eq	2.51585e-07	4.04041e-07	1.11821e-09	5.33095e-11	1.50056e-07	-3.59648e-07	5.5368e-08	1.35734e-10	4.6066e-10
Acidification	kg SO2 eq	3.06899e-06	1.01912e-05	1.26951e-08	1.3667e-09	1.7036e-06	-9.81631e-06	9.53134e-07	2.00987e-09	2.12953e-08
Eutrophication	kg PO4--- eq	9.58965e-07	1.56113e-06	1.60115e-09	1.78772e-10	2.14864e-07	-1.0705e-06	2.47811e-07	1.3707e-09	2.50664e-09
Fuel avoided
Impact category	Unit	Total	Fuel avoided	Petrol, unleaded {Europe without Switzerland}| petrol production, unleaded, petroleum refinery operation | Cut-off, U	Kerosene {Europe without Switzerland}| kerosene production, petroleum refinery operation | Cut-off, U	Petroleum {RoW}| production, onshore | Cut-off, U
Abiotic depletion	kg Sb eq	7.5816e-09	0	4.4407e-09	1.90044e-09	1.24045e-09
Abiotic depletion (fossil fuels)	MJ	2.13251	0	0.583296	0.479379	1.06983
Global warming (GWP100a)	kg CO2 eq	0.0150851	0	0.00608026	0.0037667	0.00523819
Ozone layer depletion (ODP)	kg CFC-11 eq	3.02905e-08	0	7.56067e-09	6.22143e-09	1.65084e-08
Human toxicity	kg 1,4-DB eq	0.00489543	0	0.00236699	0.00132399	0.00120445
Fresh water aquatic ecotox.	kg 1,4-DB eq	0.000654368	0	0.000176247	0.000133473	0.000344648
Marine aquatic ecotoxicity	kg 1,4-DB eq	3.47577	0	1.24855	0.817453	1.40977
Terrestrial ecotoxicity	kg 1,4-DB eq	2.06599e-05	0	8.87658e-06	5.15504e-06	6.62827e-06
Photochemical oxidation	kg C2H4 eq	8.18538e-06	0	2.72668e-06	1.79664e-06	3.66206e-06
Acidification	kg SO2 eq	0.000206407	0	6.86955e-05	4.51143e-05	9.25968e-05
Eutrophication	kg PO4--- eq	2.07924e-05	0	5.43427e-06	4.20172e-06	1.11564e-05
